# Supplementary material for: Inorganic nanoparticles promoted synthesis of heterocycles
Source: publisher site journal article supplement (doi:10.1515/psr-2022-0129), 2022-11-09
Supplement: Supplementary file 1 [file j_psr-2022-0129_suppl.docx]

To, 11/10/2022

The Editor

*Physical Science Reviews*

De Gruyter Publication

Subject: Submission of revised manuscript for peer reviewing and publication.

Sir,

With due regards, I am submitting herewith the thoroughly revised manuscript entitled “***Inorganic nanoparticles promoted synthesis of heterocycles***” for reviewing and publication in the journal of *Physical Science Reviews*. Please do the needful action at the earliest

Thanking you.

Yours sincerely,

Dr. Kongbrailatpam Gayatri Sharma

Department of Chemistry

Oriental College (Autonomous)

Imphal-795001

Manipur, India.

E-mail:gayatrish83@gmail.com
